# Supplementary material
Source: Elsevier journal article supplement (https://www.sciencedirect.com/science/article/pii/S0213911118301535)
Supplement: mmc1 [file S0213911118301535:mmc1.pdf]

## Apéndice 1

### Preparación del diálogo sobre redes y salud comunitaria

#### A) Definiciones sobre redes, colaboraciones y alianzas extraídas del glosario de promoción de la salud<sup>1</sup>

*Alianza (Alliance)*: una alianza para la promoción de la salud es una colaboración entre dos o más partes que persiguen una serie de objetivos de promoción de la salud decididos conjuntamente.

*Colaboración intersectorial (Intersectoral collaboration)*: relación reconocida entre parte o partes de distintos sectores de la sociedad que se ha establecido para emprender acciones en un tema con el fin de lograr resultados de salud o resultados intermedios de salud, de manera más eficaz, eficiente o sostenible que aquella que el sector sanitario pueda lograr actuando en solitario.

*Red (Network)*: agrupación de individuos, organizaciones y agencias, organizados de forma no jerárquica en torno a temas o preocupaciones comunes, que se abordan de manera activa y sistemática, sobre la base del compromiso y la confianza.

*Colaboración para la promoción de la salud (Partnership for health promotion)*: la colaboración para la promoción de la salud es un acuerdo

---

<sup>1</sup> OMS. Promoción de la salud. Glosario. Ginebra. 1998. Disponible en: <https://www.msssi.gob.es/profesionales/saludPublica/prevPromocion/docs/glosario.pdf>

voluntario entre dos o más socios que deciden trabajar en cooperación para obtener un conjunto de resultados de salud compartidos.

## **B) Participantes en el dialogo sobre las redes en salud comunitaria**

Los profesionales que hemos participado en *En-red-ando: dialogando sobre salud comunitaria y redes* tenemos diversas trayectorias y experiencias en diferentes tipos de redes:

- Javier Gállego Diéguez, profesional de la Dirección General de Salud Pública del Gobierno de Aragón. Ha participado en el impulso de la Red Aragonesa de Proyectos de Promoción de la Salud (RAPPS) desde 1996 y en la creación de la Red Aragonesa de Escuelas Promotoras de Salud desde 2009.
- Carmen Lineros González, profesora de la Escuela Andaluza de Salud Pública (EASP). Coordinadora del proyecto Red de Redes en la EASP. Ha participado en varias redes de salud pública de la Junta de Andalucía, y en la dinamización y formación *on-line* de diversas comunidades profesionales en red.
- Beatriz Nuin González, responsable de promoción de la salud en la Dirección de Salud Pública y Adicciones del Departamento de Salud del Gobierno Vasco. Impulsa las redes locales para la salud del País Vasco y comparte la coordinación de la Alianza de Salud Comunitaria.
- Marta Sastre Paz, desde un centro municipal dedicado a la promoción de la salud con orientación comunitaria tiene diversas experiencias en redes locales de salud comunitaria (Madrid Salud, Ayuntamiento de Madrid). Vinculada al Programa de Actividades Comunitarias en Atención Primaria desde hace más de 10 años, actualmente comparte su coordinación y dinamización estatal.

### **C) Guión elaborado para el diálogo sobre redes en salud comunitaria**

1. De qué hablamos cuando hablamos de redes (conceptos). ¿Qué es una red? ¿Por qué son útiles en promoción de la salud?
2. Tipos de redes: a) trabajo en red en el territorio; b) redes de profesionales, proyectos, estrategias, escenarios; c) red de redes. ¿Criterios de integración en las redes? ¿Variabilidad de las redes? ¿Qué finalidad y objetivos persiguen las redes?
3. Condiciones para mejorar el trabajo en red: confianza, lenguaje común, apoyo institucional (gestión de la red: aportar y recibir en la red, cómo hacer que la red siga). ¿Cuáles son los elementos principales para que exista una red? ¿Cómo se construye el lenguaje común y la confianza? ¿Cómo compaginar la cultura de la red, de carácter horizontal, con las culturas organizativas de las instituciones, más bien burocráticas? ¿Cómo facilitar la gestión de la red? ¿Cómo potenciar el sentido de pertenencia a la red? ¿Cómo puede apoyar la institución a las redes?
4. Gestión del conocimiento y aprendizajes e innovación. Transferencia. ¿Cómo fluye el conocimiento en una red? ¿Cómo las redes pueden elaborar criterios, metodologías y modelos de buenas prácticas? ¿Cómo facilitar el intercambio de saberes y experiencias? ¿Cómo detectar las necesidades de formación de los equipos de una red? ¿Qué condiciones facilitan que las redes potencien la innovación y el desarrollo de la salud comunitaria? ¿De qué manera los modelos y metodologías elaborados en el seno de las redes se extienden a otros centros y servicios fuera de la red?
5. Evaluación. Posibles resultados de las redes. Buenas prácticas para las sinergias. ¿Qué aspectos hay que evaluar en una red? ¿Cuáles pueden ser los principales resultados de una red? ¿De qué manera se puede valorar el desarrollo de sinergias por las redes? ¿Cómo evaluar el grado de evolución y madurez de una red? ¿Cómo pueden identificarse los modelos de buena práctica en una red?

### **D) Proceso de elaboración del diálogo sobre redes y salud comunitaria**

Realizamos tres conversaciones *on-line* (vía Skype) los días 1, 15 y 20 de diciembre de 2017. En la primera conversación intercambiamos nuestras experiencias sobre redes y alianzas, pusimos en común nuestras expectativas sobre el diálogo y elaboramos el guion del debate que luego realizamos en la segunda y la tercera conversaciones. El diálogo fue registrado de Skype mediante la aplicación Callnote y posteriormente fue transcrito por los participantes mediante oTranscribe, aplicación gratuita que facilita transcribir las entrevistas grabadas. El primer texto transcrito tenía 10.900 palabras y progresivamente fue reducido hasta las 1750 palabras del artículo enviado. Hay cinco pequeños vídeos que recogen fragmentos de la conversatorio en YouTube (referenciados en el Apéndice 3).

Después de realizar estos diálogos acordamos tener un encuentro presencial. Podría ser en Cádiz, para estudiar el origen de las redes... y cómo organizan sus carnavales a través de las redes locales.

## **Apéndice 2**

### **Vídeos de las experiencias de redes de salud comunitaria**

- *Las redes andaluzas de salud pública.* Lama C, Lineros C, coordinadores. Secretaría General de Salud Pública y Escuela Andaluza de Salud Pública, Consejería de Salud de la Junta de Andalucía. Disponible en: [https://s3.amazonaws.com/jornadas/9JornadasSaludPublica/Redes\\_de\\_salud\\_publica\\_peq.webm](https://s3.amazonaws.com/jornadas/9JornadasSaludPublica/Redes_de_salud_publica_peq.webm)
- *Creando redes locales.* Abordaje comunitario de la salud. Osakidetza, Departamento de Salud, Gobierno Vasco. Disponible en: <https://www.youtube.com/watch?v=RT51ykRodMo>
- *Red de iniciativas.* Vídeo de la Red Aragonesa de Proyectos de Promoción de la Salud. Disponible en: [https://www.youtube.com/playlist?list=PLF6Yvp\\_UGPoZMBpr3PPfJd\\_AkJRXJ1kJm](https://www.youtube.com/playlist?list=PLF6Yvp_UGPoZMBpr3PPfJd_AkJRXJ1kJm)
- *20 años PACAP Zaragoza.* Disponible en: <https://vimeo.com/193096211>

### **Apéndice 3**

**Las redes, la horma del zapato de la salud comunitaria. Resumen visual de los diálogos**

- *¿Que es una red?* Diálogo sobre las redes de salud comunitaria. Disponible en: <https://youtu.be/JOi691nKeX4>
- *Elementos de una red.* Diálogo sobre las redes de salud comunitaria. Disponible en: <https://youtu.be/8tfda1dJmYQ>
- *La “moda” de crear redes.* Diálogo sobre las redes de salud comunitaria. Disponible en: <https://youtu.be/JkiXLsDM0YQ>
- *¿Por qué son importantes las redes en promoción de la salud?* Diálogo sobre las redes de salud comunitaria. Disponible en: <https://youtu.be/1sRoVtbmRsk>
- *Las redes, la horma del zapato de la salud comunitaria.* Diálogo sobre las redes de salud comunitaria. Disponible en: [https://youtu.be/\\_aY9AVbwnl4](https://youtu.be/_aY9AVbwnl4)

## Apéndice 4

### Redes de promoción de salud y directorios de redes de salud local

| Red                    | Ámbito | Promueve      | Dirección web                                             |
|------------------------|--------|---------------|-----------------------------------------------------------|
| SHE Schools for health | Europa | Unión Europea | <a href="https://goo.gl/YgGC8r">https://goo.gl/YgGC8r</a> |

|                                                                                             |           |                                                        |                                                                                                                                 |
|---------------------------------------------------------------------------------------------|-----------|--------------------------------------------------------|---------------------------------------------------------------------------------------------------------------------------------|
| Europa                                                                                      |           |                                                        |                                                                                                                                 |
| The European Network for Workplace Health Promotion                                         | Europa    | Unión Europea                                          | <a href="https://goo.gl/MA1FvY">https://goo.gl/MA1FvY</a>                                                                       |
| WHO European Healthy Cities Network                                                         | Europa    | OMS                                                    | <a href="https://goo.gl/psggjo">https://goo.gl/psggjo</a>                                                                       |
| Localiza Salud                                                                              | España    | Ministerio de Sanidad y Servicios Sociales e Igualdad  | <a href="https://goo.gl/QDKYfY">https://goo.gl/QDKYfY</a>                                                                       |
| Alianza de Salud Comunitaria                                                                | España    | Formada por 21 entidades                               | <a href="http://www.alianzasaludcomunitaria.org/">http://www.alianzasaludcomunitaria.org/</a>                                   |
| Buscador de activos para la salud                                                           | España    | Alianza de Salud Comunitaria                           | <a href="https://goo.gl/dHK4bd">https://goo.gl/dHK4bd</a>                                                                       |
| Programa de Actividades Comunitarias en Atención Primaria                                   | España    | Sociedad Española de Medicina de Familia y Comunitaria | <a href="http://www.pacap.net/pacap/">http://www.pacap.net/pacap/</a>                                                           |
| Red de Actividades Comunitarias                                                             | España    | Sociedad Española de Medicina de Familia y Comunitaria | <a href="https://goo.gl/rXVSzS">https://goo.gl/rXVSzS</a>                                                                       |
| Red Española de Ciudades Saludables                                                         | España    | Federación Española de Municipios y Provincias         | <a href="https://goo.gl/JzCNhE">https://goo.gl/JzCNhE</a>                                                                       |
| Redes Andaluzas de Salud Pública                                                            | Andalucía | Junta de Andalucía                                     | <a href="https://goo.gl/Egek94">https://goo.gl/Egek94</a>                                                                       |
| Red de Profesionales de Atención Primaria de Zonas con Necesidades de Transformación Social | Andalucía | Junta de Andalucía                                     | <a href="https://goo.gl/PXRbxm">https://goo.gl/PXRbxm</a>                                                                       |
| Red Aragonesa de Actividades de Promoción de la Salud                                       | Aragón    | Gobierno de Aragón                                     | <a href="https://goo.gl/1hQeom">https://goo.gl/1hQeom</a><br>Blog:<br><a href="https://goo.gl/1ebMRC">https://goo.gl/1ebMRC</a> |

|                                                                            |             |                                                                             |                                                                                                                                 |
|----------------------------------------------------------------------------|-------------|-----------------------------------------------------------------------------|---------------------------------------------------------------------------------------------------------------------------------|
| Red Aragonesa de Escuelas Promotoras de Salud                              | Aragón      | Gobierno de Aragón                                                          | <a href="https://goo.gl/f8Gxrm">https://goo.gl/f8Gxrm</a><br>Blog:<br><a href="https://goo.gl/42LGqa">https://goo.gl/42LGqa</a> |
| Asturias Actúa                                                             | Asturias    | Gobierno de Asturias                                                        | <a href="https://goo.gl/Ye7p6b">https://goo.gl/Ye7p6b</a>                                                                       |
| Red Canaria de Escuelas Promotoras de Salud                                | Canarias    | Gobierno de Canarias                                                        | <a href="https://goo.gl/DV13pM">https://goo.gl/DV13pM</a>                                                                       |
| Red Cántabra de Escuelas Promotoras de Salud                               | Cantabria   | Gobierno de Cantabria                                                       | <a href="https://goo.gl/SG8iwL">https://goo.gl/SG8iwL</a>                                                                       |
| Xarxa Catalana d'Hospitals i Centres Promotors de la Salut (HPH-Catalunya) | Cataluña    | International Network of Health Promoting Hospitals & Health Services (HPH) | <a href="http://www.promociodelasaluthph.cat/">http://www.promociodelasaluthph.cat/</a>                                         |
| Cercador d'Actius i Salut                                                  | Cataluña    | Agència de Salut Pública de Catalunya                                       | <a href="https://goo.gl/eXDJCY">https://goo.gl/eXDJCY</a>                                                                       |
| AUPA                                                                       | Cataluña    | Sociedad Catalana de Medicina Familiar y Comunitaria                        | <a href="https://goo.gl/rxJndL">https://goo.gl/rxJndL</a>                                                                       |
| Red Extremeña de Escuelas Promotoras de Salud                              | Extremadura | Junta de Extremadura                                                        | <a href="https://goo.gl/BdQpvK">https://goo.gl/BdQpvK</a>                                                                       |
| Activos para la salud                                                      | Navarra     | Instituto de Salud Pública de Navarra                                       | <a href="https://goo.gl/yzZ28x">https://goo.gl/yzZ28x</a>                                                                       |
| Euskadi Aktiboa                                                            | País Vasco  | Departamento de Salud del Gobierno Vasco                                    | <a href="https://goo.gl/Fg88RC">https://goo.gl/Fg88RC</a>                                                                       |
